# Supplementary material
Source: Springer Nature journal article supplement (https://www.springermedizin.de/resource/supplementary/13058_2010_9463_MOESM7_ESM.pdf/9702214)

## Family 265

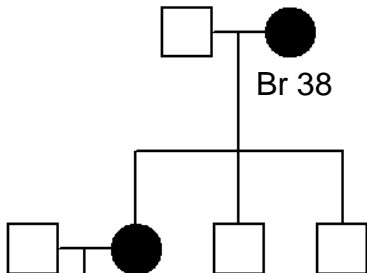

***CHEK2*, c.1100delC**

***PALB2*, c.1676A>G**

Supplement: MOESM7 [file 9702214]
